# Supplementary material for: Tuning the conductivity type in a room temperature magnetic oxide: Ni-doped Ga0.6Fe1.4O3 thin films
Source: Royal Society of Chemistry journal article supplement (doi:10.1039/c6ra01540a), 2016-01-01
Supplement: c6ra01540a1.pdf [file c6ra01540a1.pdf]

## Electronic Supplementary Information

# Tuning the conductivity type in a room temperature magnetic oxide: Ni-doped $\text{Ga}_{0.6}\text{Fe}_{1.4}\text{O}_3$ thin films

A. Demchenko,<sup>a</sup> Y. Chang,<sup>b</sup> E. Chikoidze,<sup>b</sup> B. Berini,<sup>b</sup> C. Lefèvre,<sup>a</sup> F. Roulland,<sup>a</sup> C. Ulhaq-Bouillet,<sup>a</sup> G. Versini,<sup>a</sup> S. Barre,<sup>a</sup> C. Leuvrey,<sup>a</sup> V. Favre-Nicolin,<sup>c,d</sup> N. Boudet,<sup>c,e</sup> Spyridon Zafeiratos,<sup>f</sup> Yves Dumont<sup>b</sup> and N. Viart<sup>a,\*</sup>

<sup>a</sup> Institut de Physique et Chimie des Matériaux de Strasbourg and Labex NIE, Université de Strasbourg - CNRS UMR 7504, 67034 Strasbourg Cedex 2, France

<sup>b</sup> Groupe d'Etude de la Matière Condensée (GEMaC), Université de Versailles St Quentin en Y. – CNRS, Université Paris-Saclay, 45 avenue des Etats Unis, 78035 Versailles, France

<sup>c</sup> Université Grenoble Alpes, 38000 Grenoble, France

<sup>d</sup> CEA, INAC-SP2M, 38000 Grenoble, France

<sup>e</sup> CNRS - Institut Néel, 38042 Grenoble, France

<sup>f</sup> Institut de Chimie et Procédés pour l'Energie, l'Environnement et la Santé (ICPEES), Université de Strasbourg, CNRS UMR 7515, 25 rue Becquerel, 67087 Strasbourg Cedex 02, France

\* corresponding author : [viart@unistra.fr](mailto:viart@unistra.fr)

Table 1: Compositions of the Ni-doped films determined by inductively coupled plasma atomic emission spectroscopy (ICP-AES).

| Expected Ni content (%) | Fe (%)     | Ga (%)     | Ni (%)    |
|-------------------------|------------|------------|-----------|
| 0.5                     | 72.7 ± 1.3 | 26.6 ± 0.8 | 0.7 ± 0.1 |
| 2                       | 71.6 ± 1.6 | 26.1 ± 0.6 | 2.3 ± 0.1 |
| 5                       | 68.9 ± 1.2 | 26.8 ± 1.0 | 4.3 ± 0.2 |

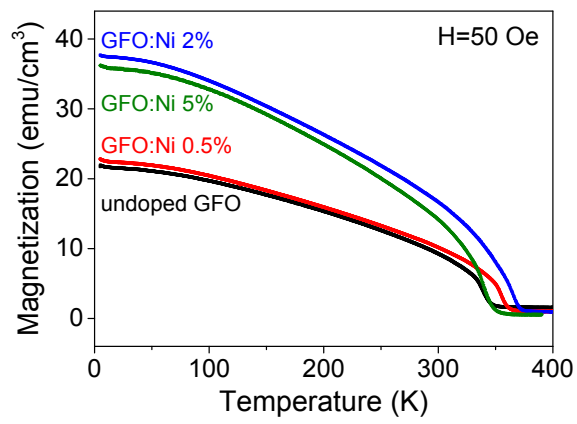

Fig. 1: Field-cooled magnetization curves of the doped and undoped GFO thin films, measured in a 50 Oe magnetic field applied parallel to the films

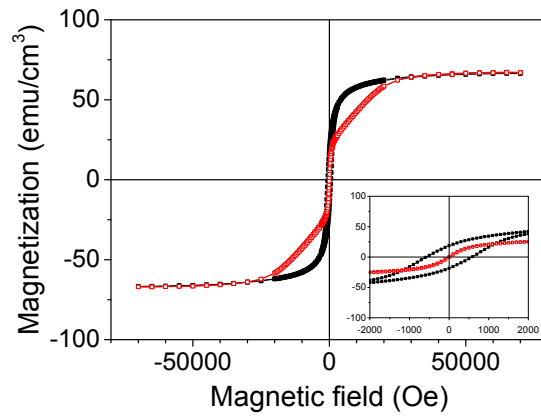

(a)

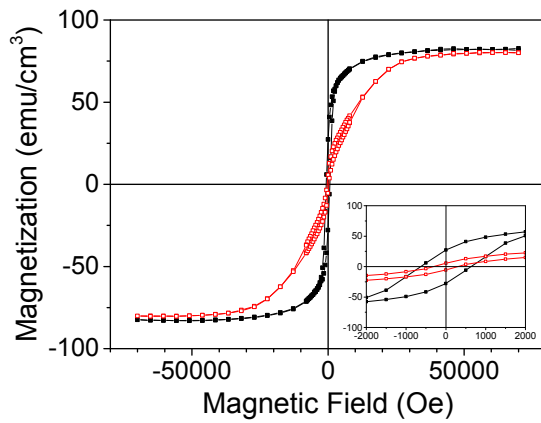

(b)

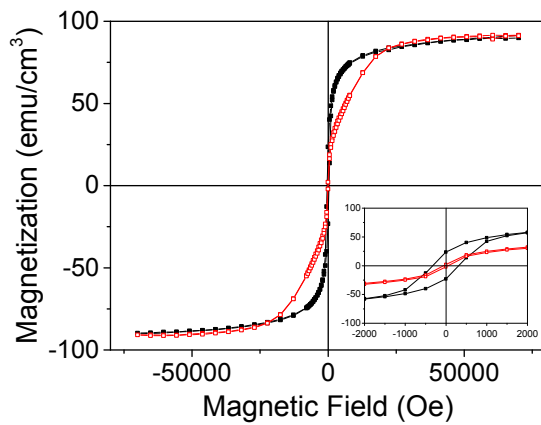

(c)

Fig. 2: Hysteresis curves of the Ni- (a) 0.5%, (b) 2%, and (c) 5% doped GFO thin films, measured at 300 K in parallel (black filled squares) and perpendicular (red hollow squares).

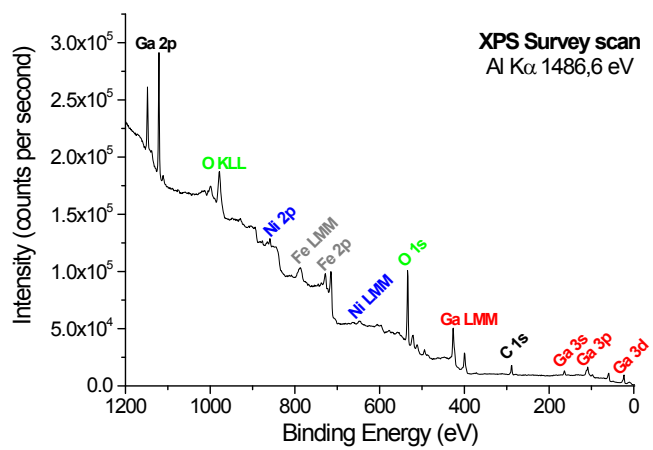

Fig. 3: XPS survey scan spectrum of the 5% Ni-doped sample.
